# Supplementary material
Source: publisher site journal article supplement (https://www.spandidos-publications.com/5139/downloadSupplementary)
Supplement: Supplementary file 1 [file downloadSupplementary]

Video S1. The tumor was separated from the left cavernous sinus during the second stage of surgery of case 2.

Video S2. The sellar septum was exposed during the second stage of surgery of case 2.

Video S3. The tumor in the scar of the stump was resected during the second stage of surgery of case 2.

Video S4. Tumor cavity was exposed during the second stage of surgery of case 2.
